# Supplementary figures and images for: Bicoid gradient formation and function in the Drosophila pre-syncytial blastoderm
Source: eLife journal article supplement (doi:10.7554/elife.13222), 2016-02-02

Figure 8, supplement 1

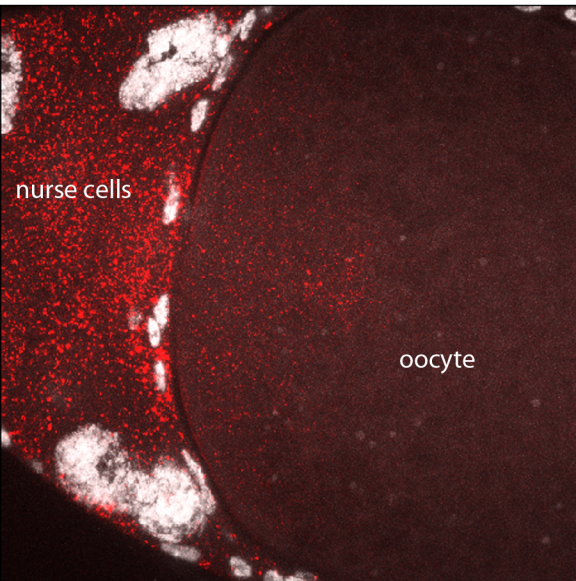

Supplement: supp [file elife-13222-supp-v1.zip]

Figure 4, supplement 2

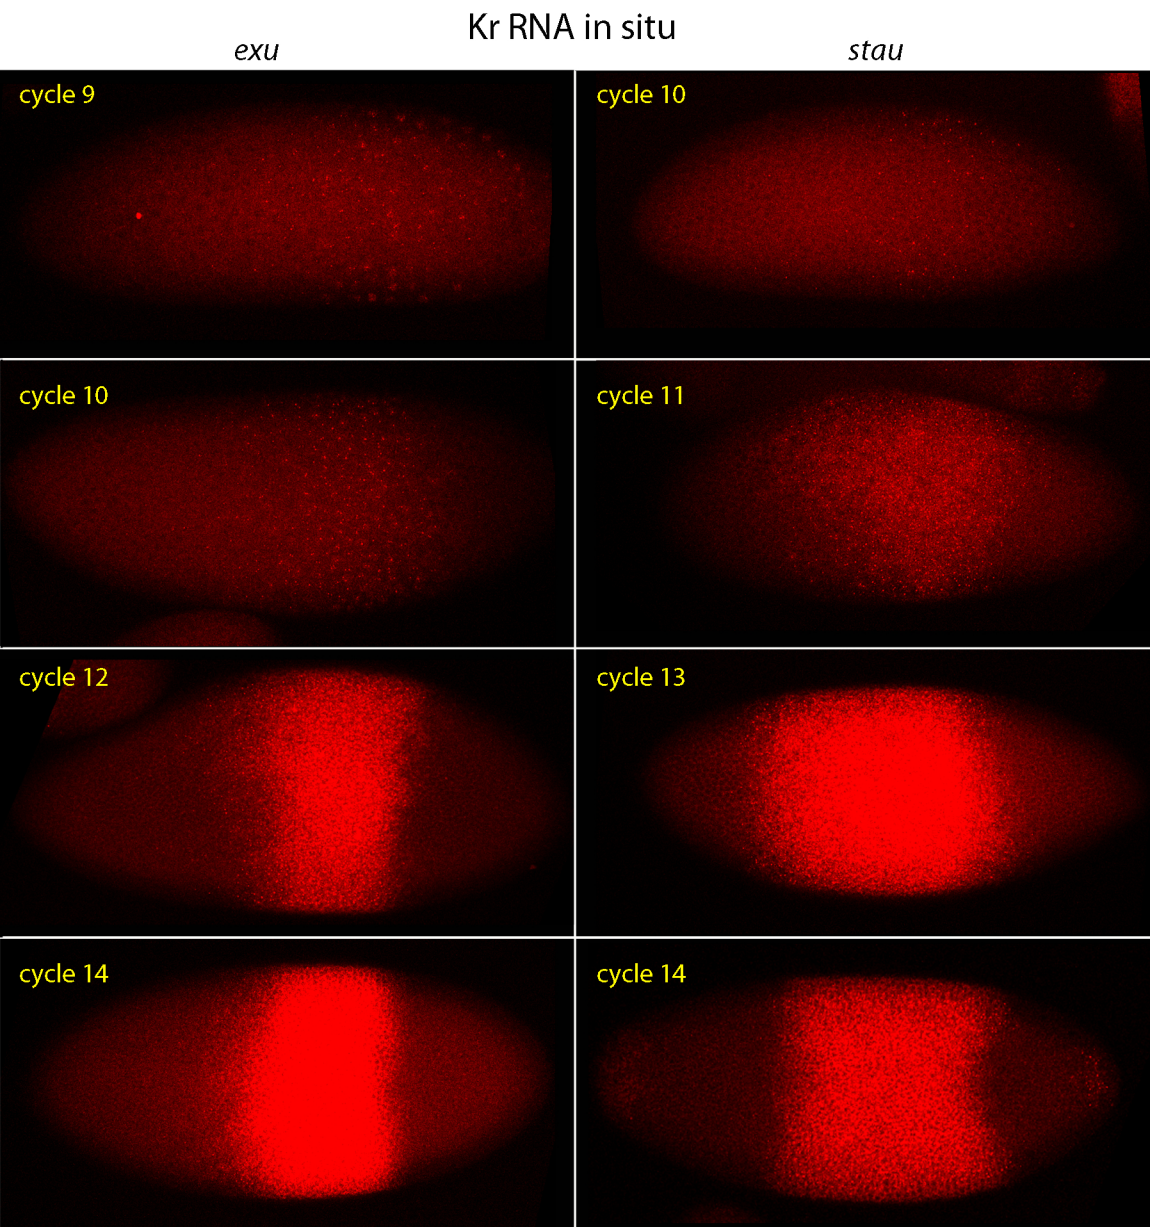

Supplement: supp [file elife-13222-supp-v1.zip]

Figure 1, supplement 2

*stau*

21%

*exu*

24%

WT  
2X *bcd*

35%

6X *bcd*

45%

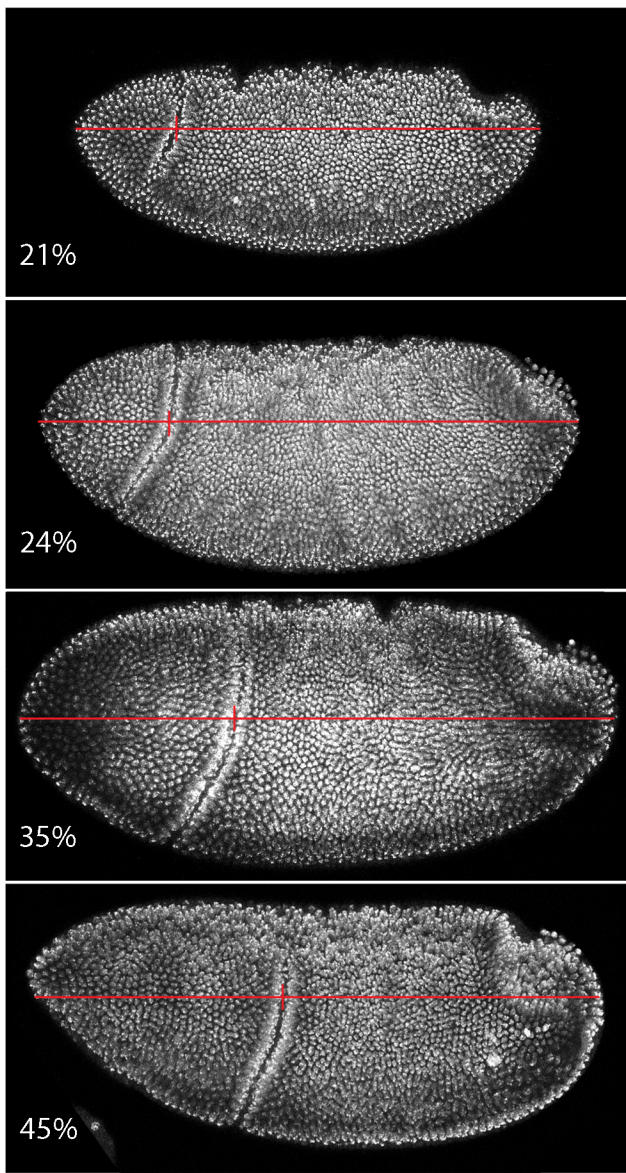

Supplement: supp [file elife-13222-supp-v1.zip]

Figure 4, supplement 1

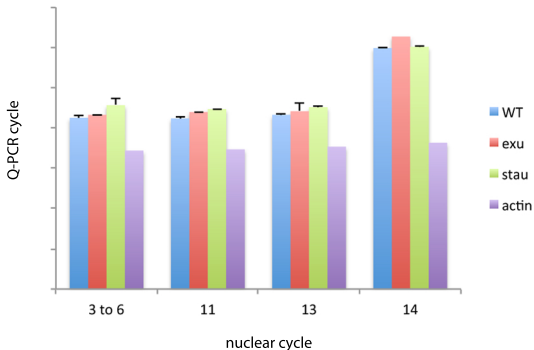

Supplement: supp [file elife-13222-supp-v1.zip]

Figure 1, supplement 2

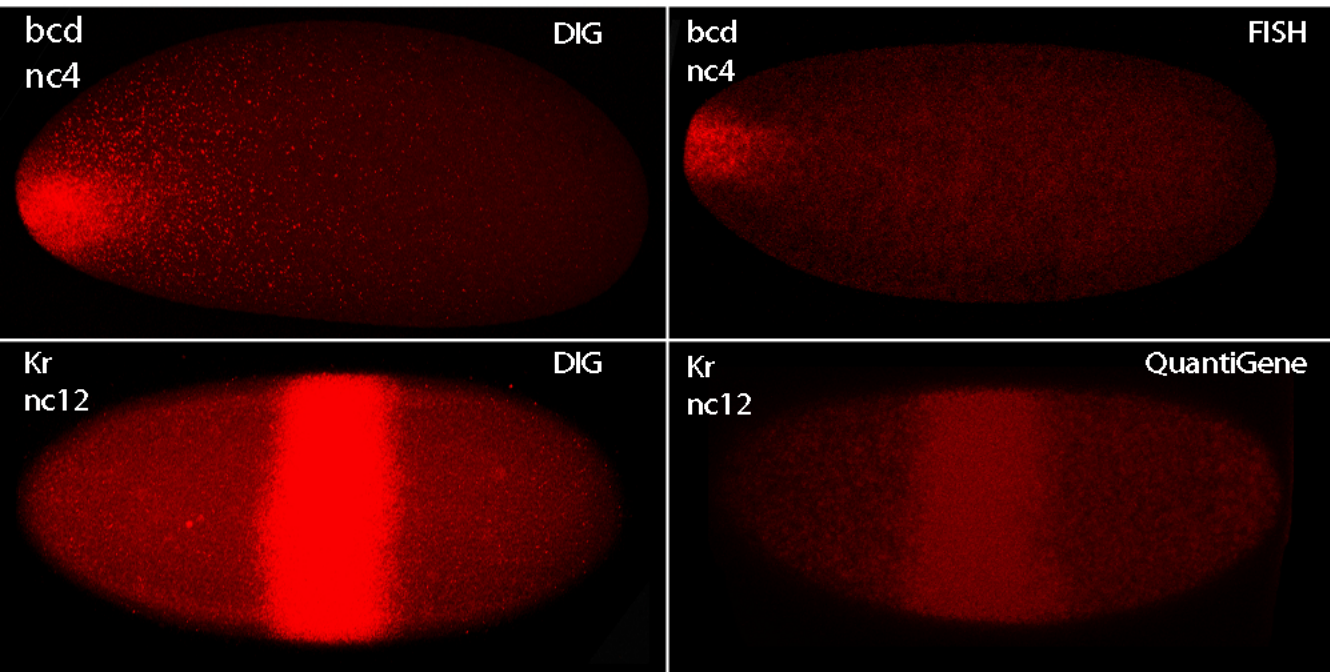

Supplement: supp [file elife-13222-supp-v1.zip]
